# Supplementary material for: Current physical activity guidelines for health are insufficient to mitigate long-term weight gain: more data in the fitness versus fatness debate (The HUNT study, Norway)
Source: HighWire-hosted journal article supplement (doi:10.1136/bjsports-2014-093416), 2014-04-29
Supplement: bjsports-2014-093416supp.pdf [file bjsports-2014-093416supp.pdf]

**Table S1** Difference in body weight in kilograms, mean (95% CI) over any 11 years period by physical activity levels, after additional adjustment of baseline (HUNT-1) body weight

|                                                                                                                                                                                                                                                                          | Physical activity categories |          |                      |                      |                      |       | <i>P</i> -value <sup>b</sup> | <i>P</i> -value <sup>c</sup> |
|--------------------------------------------------------------------------------------------------------------------------------------------------------------------------------------------------------------------------------------------------------------------------|------------------------------|----------|----------------------|----------------------|----------------------|-------|------------------------------|------------------------------|
|                                                                                                                                                                                                                                                                          | No <sup>a</sup>              | Inactive | Below recommended    | Recommended          | Above recommended    |       |                              |                              |
| <b>Men</b>                                                                                                                                                                                                                                                               |                              |          |                      |                      |                      |       |                              |                              |
| Model                                                                                                                                                                                                                                                                    | 8344                         | Ref.     | -0.25 (-0.42,- 0.08) | -0.71 (-0.88,-0.53)  | -1.98 (-2.22, -1.74) | <.001 |                              |                              |
| Age stratified analyses                                                                                                                                                                                                                                                  |                              |          |                      |                      |                      |       |                              |                              |
| <i>Age, years</i>                                                                                                                                                                                                                                                        |                              |          |                      |                      |                      |       |                              |                              |
| <40                                                                                                                                                                                                                                                                      | 5042                         | Ref.     | -0.15 (-0.34, 0.03)  | -0.27 (-0.47, -0.06) | -0.64 (-0.90, -0.38) | <.001 |                              |                              |
| 40-59                                                                                                                                                                                                                                                                    | 3096                         | Ref.     | -0.48 (-0.72, -0.25) | -1.03 (-1.27, -0.79) | -1.96 (-2.29, -1.62) | <.001 | <.001                        |                              |
| ≥ 60                                                                                                                                                                                                                                                                     | 206                          | Ref.     | -0.24 (-0.69, 0.21)  | -0.34 (-0.80, -0.12) | -1.65 (-2.22, -1.07) | <.001 |                              |                              |
| <b>Women</b>                                                                                                                                                                                                                                                             |                              |          |                      |                      |                      |       |                              |                              |
| Model                                                                                                                                                                                                                                                                    | 10744                        | Ref.     | -0.10 (-0.27, 0.06)  | -0.58 (-0.77, -0.40) | -2.01 (-2.30, -1.71) | <.001 |                              |                              |
| Age stratified analyses                                                                                                                                                                                                                                                  |                              |          |                      |                      |                      |       |                              |                              |
| <i>Age, years</i>                                                                                                                                                                                                                                                        |                              |          |                      |                      |                      |       |                              |                              |
| <40                                                                                                                                                                                                                                                                      | 6 245                        | Ref.     | -0.19 (-0.37, -0.01) | -0.46 (-0.68,- 0.25) | -1.06 (-1.48, -0.64) | <.001 |                              |                              |
| 40-59                                                                                                                                                                                                                                                                    | 4 163                        | Ref.     | -0.11 (-0.33, 0.12)  | -0.94 (-1.19, -0.69) | -2.11 (-2.51, -1.71) | <.001 | <.001                        |                              |
| ≥ 60                                                                                                                                                                                                                                                                     | 375                          | Ref.     | -0.19 (-0.62, 0.23)  | -0.20 (-0.67, 0.28)  | -2.33 (-3.03, -1.63) | <.001 |                              |                              |
| Model, adjusted for age, diabetes status (yes or no), smoking (never, former or current), and alcohol (abstainers, <1 times per 14 days, 1-4 times per 14 days, or ≥5 times per 14 days), time period-dummies of HUNT wave (H1, H2, or H3), and body weight at baseline. |                              |          |                      |                      |                      |       |                              |                              |
| <sup>a</sup> Number of subjects at baseline (HUNT-1).                                                                                                                                                                                                                    |                              |          |                      |                      |                      |       |                              |                              |
| <sup>b</sup> <i>P</i> -value for trend across categories.                                                                                                                                                                                                                |                              |          |                      |                      |                      |       |                              |                              |
| <sup>c</sup> <i>P</i> -value for interaction.                                                                                                                                                                                                                            |                              |          |                      |                      |                      |       |                              |                              |

**Table S2** Difference in body weight in kilograms, mean (95% CI) by physical activity levels, after additional adjustment of sitting time

|              | Physical activity categories |          |                      |                      |                      | <i>P</i> -value <sup>b</sup> |
|--------------|------------------------------|----------|----------------------|----------------------|----------------------|------------------------------|
|              | No <sup>a</sup>              | Inactive | Below recommended    | Recommended          | Above recommended    |                              |
| <b>Men</b>   |                              |          |                      |                      |                      |                              |
| Model 1      | 7459                         | Ref.     | -1.57 (-2.30, -0.83) | -2.31 (-3.03,-1.59)  | -4.38 (-5.32, -3.44) | <.001                        |
| Model 2      | 5692                         | Ref.     | -1.42 (-2.24, -0.60) | -2.26 (-3.07,-1.44)  | -4.46 (-5.57, -3.34) | <.001                        |
| <b>Women</b> |                              |          |                      |                      |                      |                              |
| Model 1      | 9033                         | Ref.     | -2.12 (-2.88, -1.35) | -3.96 (-4.71, -3.22) | -6.72 (-7.70, -5.74) | <.001                        |
| Model 2      | 5905                         | Ref.     | -1.96 (-2.94, -0.98) | -3.61 (-4.55, -2.68) | -7.07 (-8.30, -5.85) | <.001                        |

Model 1, adjusted for age, diabetes status (yes or no), smoking (never, former or current), and alcohol (abstainers, <1 times per 14 days, 1-4 times per 14 days, or ≥5 times per 14 days, and sitting time).

Model 2, additionally adjusted for occupation activity (sedentary, walk and life, or heavy manual work).

<sup>a</sup>Number of subjects at HUNT-3.

<sup>b</sup>*P*-value for trend across categories.
